# Supplementary material for: Chronic Corticosterone Exposure Suppresses Copper Transport through GR-Mediated Intestinal CTR1 Pathway in Mice
Source: MDPI journal article supplement (doi:10.3390/biology12020197), 2023-01-28

Supplementary Table S1. Nucleotide sequences of specific primers for qPCR

| Target genes     | GenBank No. | Sequences (5' to 3')                                 |
|------------------|-------------|------------------------------------------------------|
| Atp7b            | NC_000074.7 | F: GGGGACGATGCCTGAACAG<br>R: TAGCCAACATTGTCTGAAGGCG  |
| Atox1            | NC_000077.7 | F: CTGTTTGTGAGGGTTGCCA<br>R: GGGAGGAGTGGAGTTCAACA    |
| Ccs              | NC_000085.7 | F: CTCGCTCCTCCCAGATAGTG<br>R: CAGCCTGGTTATCGATGAGGG  |
| Cox              | NC_000067.7 | F: GAAGAAGCCACTGAAGCCCT<br>R: CCTCATGCACTCCTTGTTGGG  |
| Steap2           | NC_000071.7 | F: ACCGCTTTTACACACCACCA<br>R: TCCTCCCATGCCTTCGTCTA   |
| Sod1             | NC_000082.7 | F: CCACTTCGAGCAGAAGGCAA<br>R: AGTCACATTGCCAGGTCTC    |
| Dmt1             | NC_000081.7 | F: TCACCATCGCAGACACTTTTG<br>R: GACAGGACGGCACGAACAT   |
| Atp7a            | NC_000086.8 | F: CTCGCAAACAGCACAGGGA<br>R: GTGGCTCTTTCATGTCTGCTG   |
| Dcytb            | NC_000068.8 | F: CTGTCGGTGATCTTCGTGCT<br>R: GATGAAGACGAAGCCGGTCA   |
| Ctrl             | NC_000070.7 | F: TGCCGATGGTTTGGTGTTTG<br>R: AACCATATCAAAGGCTCTGTGG |
| Mt               | NC_000074.7 | F: TCCTGCAAGAAGAGCTGCTG<br>R: CTGTTTCGTCACATCAGGCAC  |
| Cp               | NC_000069.7 | F: CATCGTGAGGTGCCCTACAG<br>R: CATCGTGAGGTGCCCTACAG   |
| Tubulin- $\beta$ | NC_000074.7 | F: CCCATCTACGAGGGCTAT<br>R: TGTCACGCACGATTTC         |

Supplementary Table S2. Details of antibodies used in the experiment

| Antibodies                                       | Source                    | Catalogue no. | Dilution ratio |
|--------------------------------------------------|---------------------------|---------------|----------------|
| Primary antibody                                 |                           |               |                |
| CTR1                                             | Novus                     | NB100-402SS   | 1:200(IF)      |
| CTR1                                             | Affinity                  | DF13356       | 1:1000         |
| ATP7A                                            | Affinity                  | DF8506        | 1:1000         |
| DMT1                                             | Abcam                     | ab55735       | 1:1000         |
| CP                                               | Proteintech               | 21131-1-AP    | 1:1000         |
| DCYTB                                            | Proteintech               | 26735-1-AP    | 1:1000         |
| ATP7B                                            | Proteintech               | 19786-1-AP    | 1:1000         |
| GR                                               | Proteintech               | 24050-1-AP    | 1:200~1000     |
| p-GR (Ser211)                                    | Cell Signaling Technology | 4161S         | 1:1000         |
| HEPH                                             | Proteintech               | 11148-1-AP    | 1:1000         |
| MT                                               | Affinity                  | DF6755        | 1:100          |
| GAPDH                                            | Bioworld                  | MB001H        | 1:10000        |
| $\beta$ -actin                                   | Bioworld                  | bs6007M       | 1:10000        |
| Tubulin- $\alpha$                                | Bioworld                  | BS1699        | 1:10000        |
| Secondary antibody                               |                           |               |                |
| Goat anti-Mouse IgG<br>(H+L) -HRP                | Bioworld                  | BS12478       | 1:10000        |
| Goat anti-Rabbit IgG<br>(H+L)-HRP                | Bioworld                  | BS13278       | 1:10000        |
| Rabbit Anti-Goat IgG<br>(H+L)-HRP                | Bioworld                  | BS30503       | 1:10000        |
| Goat Anti-Rabbit IgG<br>H&L(Alexa Fluor®<br>488) | Abcam                     | ab150077      | 1:1000         |

Supplementary Table S3. Nucleotide sequences of specific primers for CHIP-PCR

| Target genes | GenBank No. | Sequences (5' to 3')    |
|--------------|-------------|-------------------------|
| CTR1         | NC_000070.7 | F: AGGCCCCATACACAGGCATA |
|              |             | R: GAATGCCTGCACCCACTTAG |

## Figure captions

Figure S1. Corticosterone-exposed mice plasma corticosterone levels are up-regulated.

Figure S1

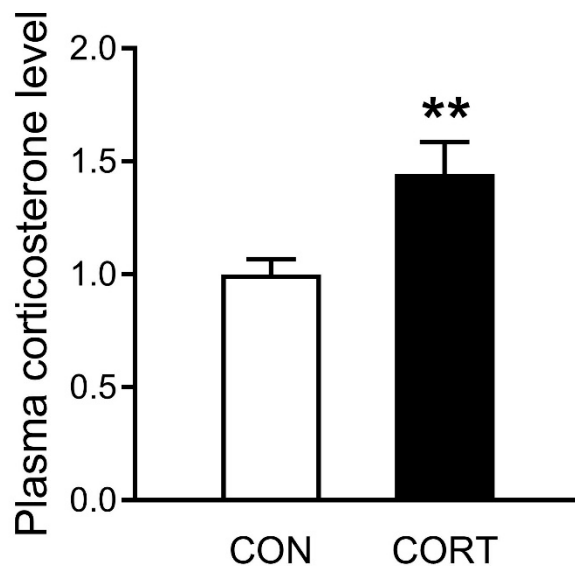



The following supplementary files are the images of full blots in protein analysis and H&E staining. The molecular weight markers have been labeled.

Figure S2A Mouse duodenum H&E staining, the first three are the control group, the last three are the corticosterone group, n=3

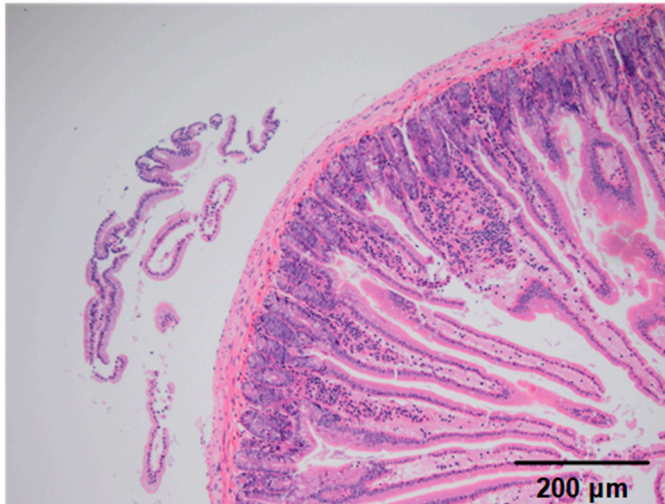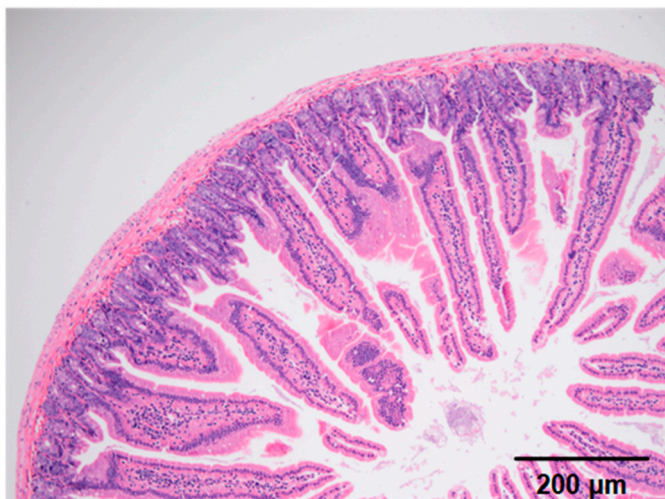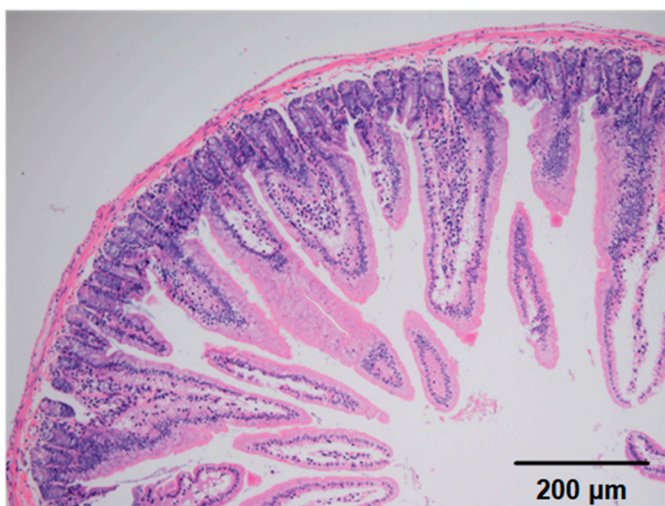

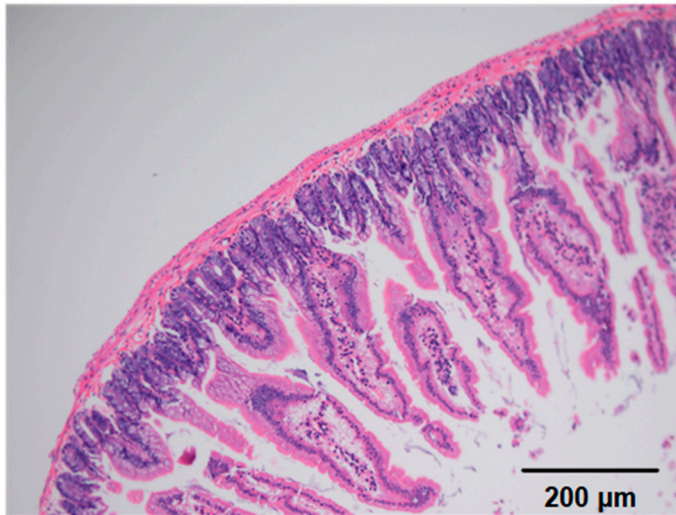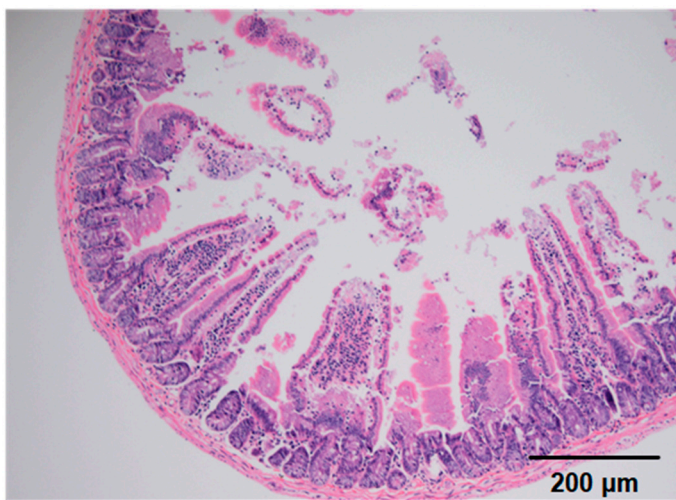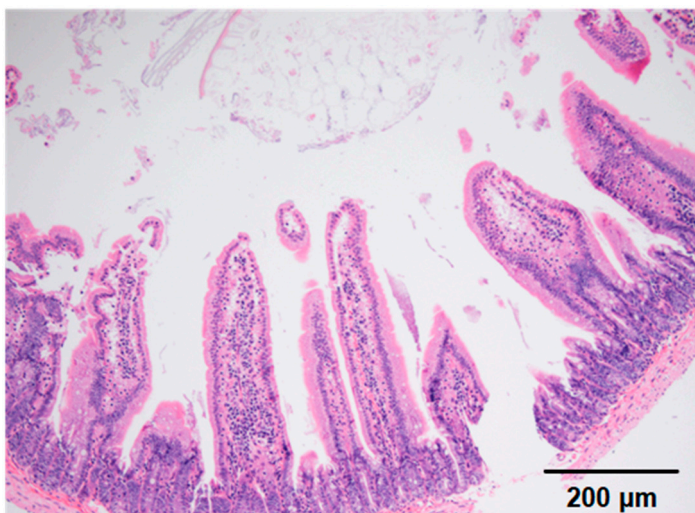

Figure S2F CTR1, ATP7A, ATP7B, CP, DCYTB, HEPH, Tublin- $\alpha$  bands observed in duodenum r of mice

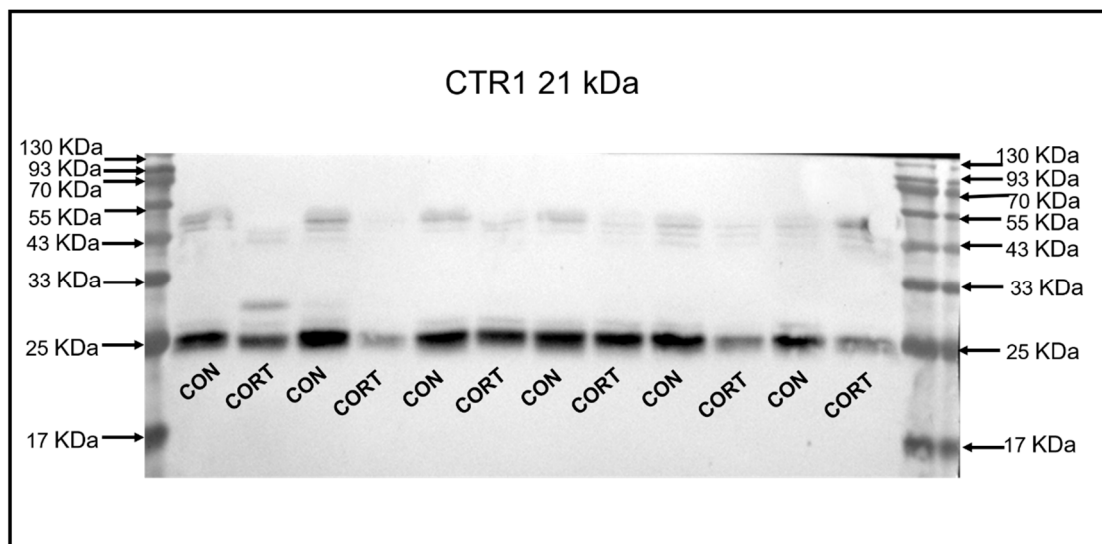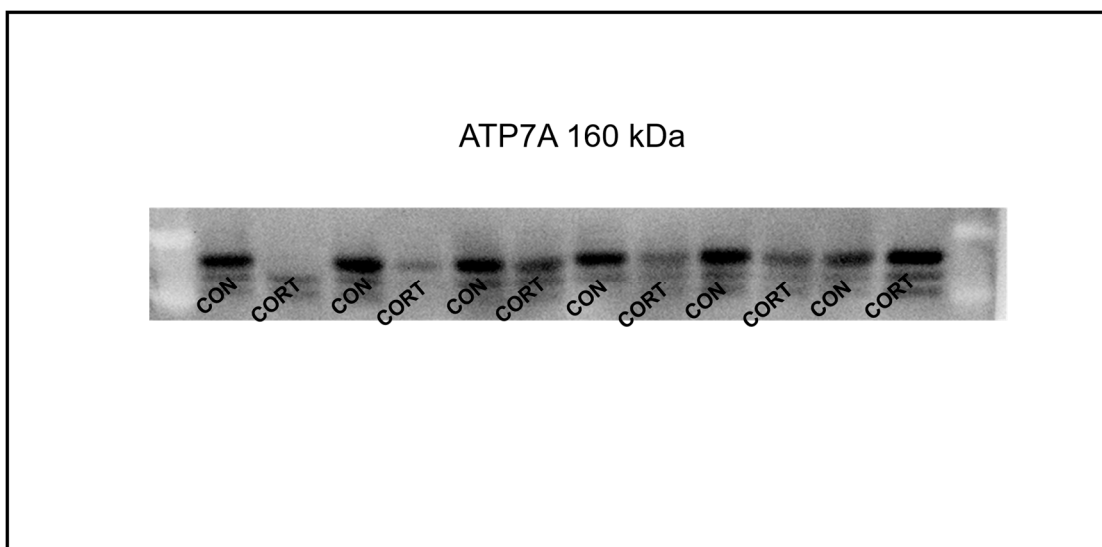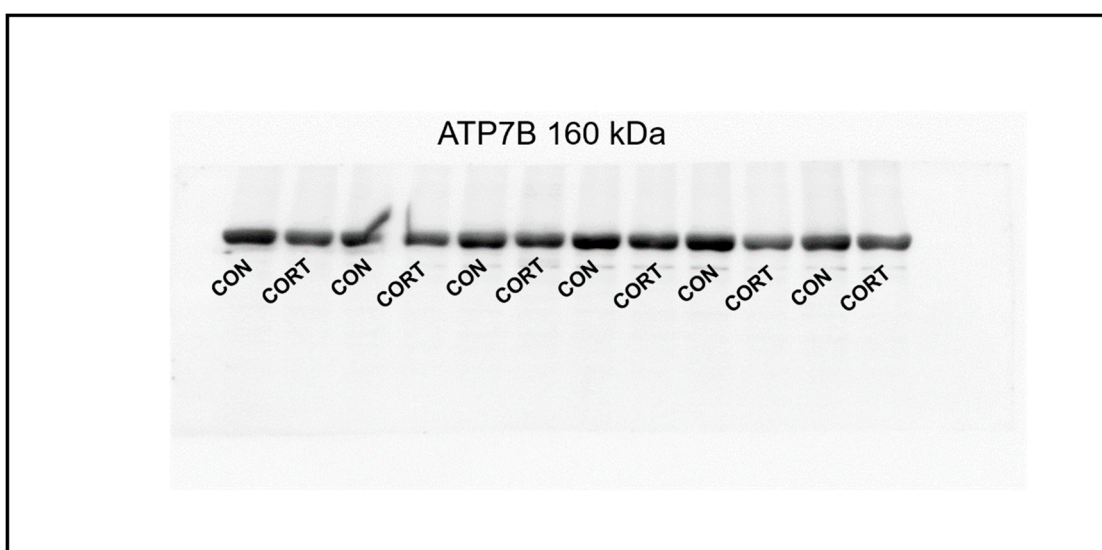



CP 85 kDa

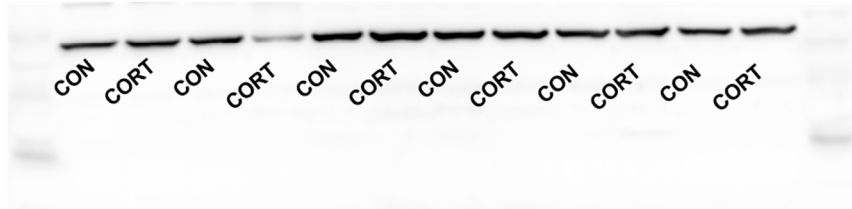

DCYTB 25 kDa

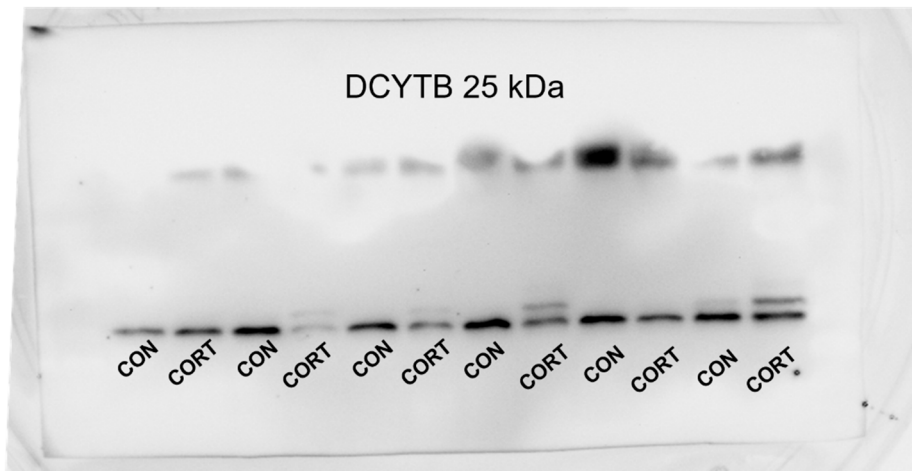

HEPH 130 kDa

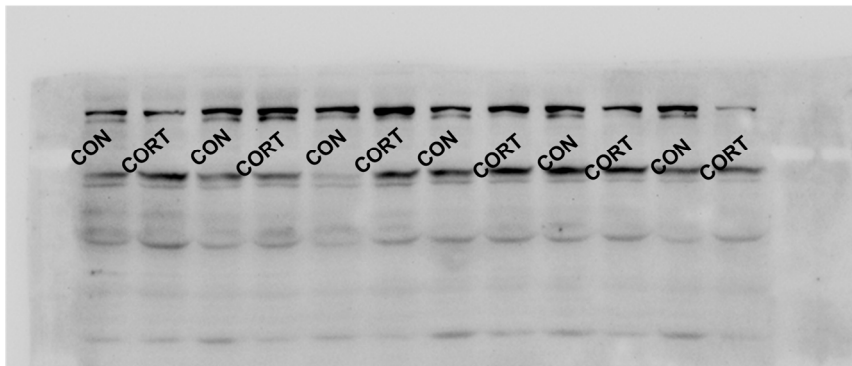

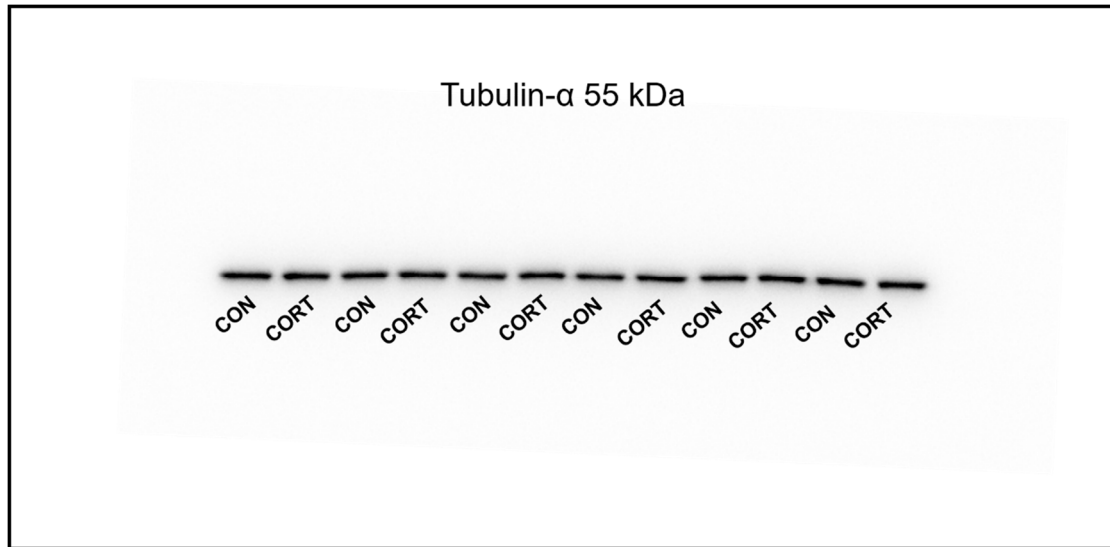

Figure S3A up. Mouse liver H&E staining, the first three pictures are the control, and the last three pictures are the CORT group, n=3

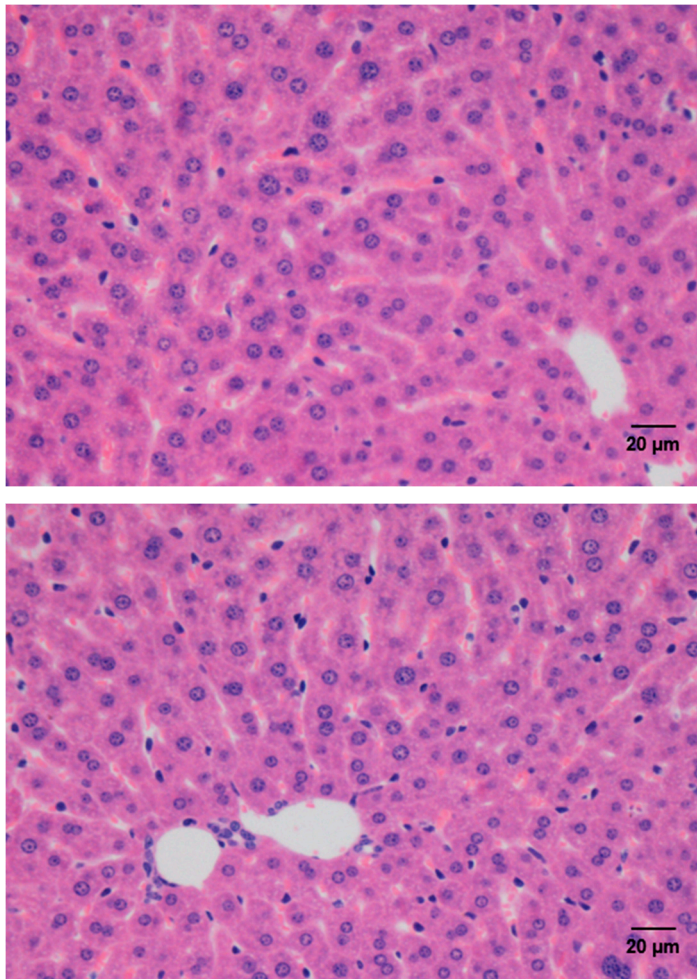

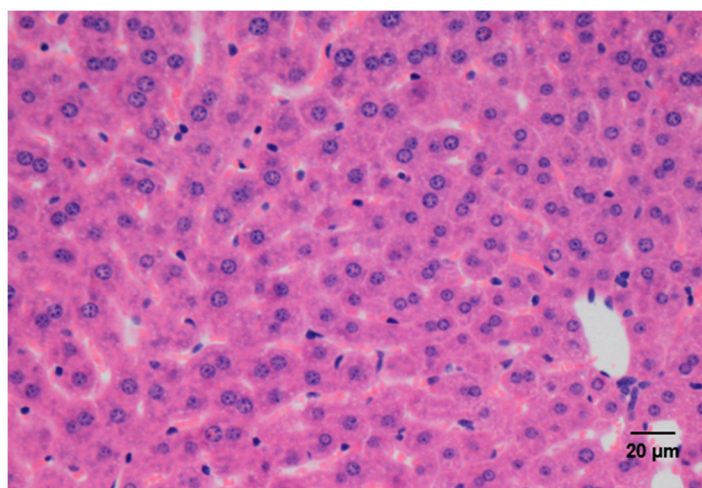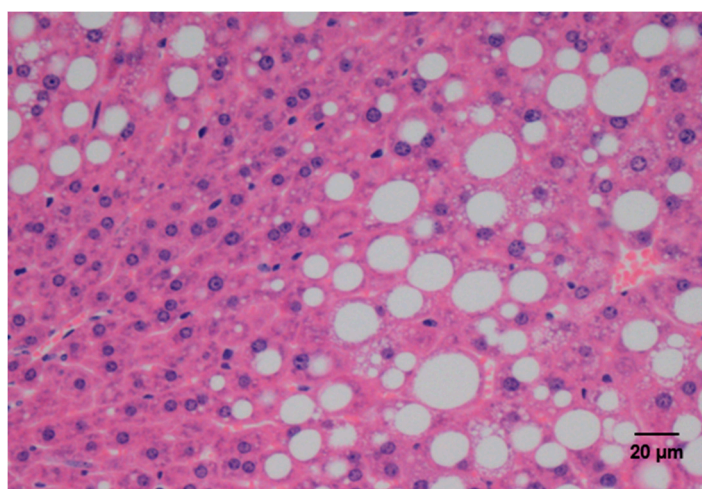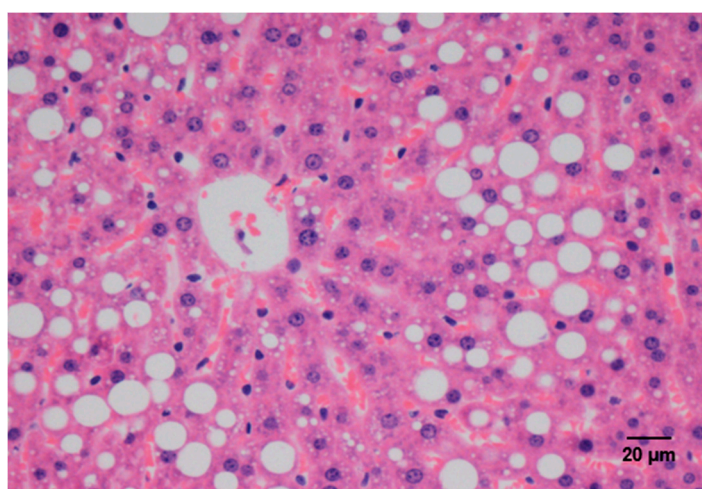



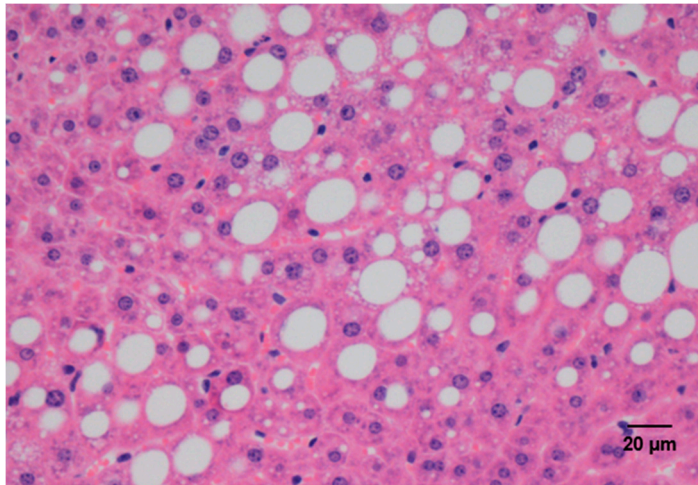

Figure S3A down. Mouse liver metallothionein immunohistochemistry, the first four pictures are the control, and the last four pictures are the CORT group, n=3

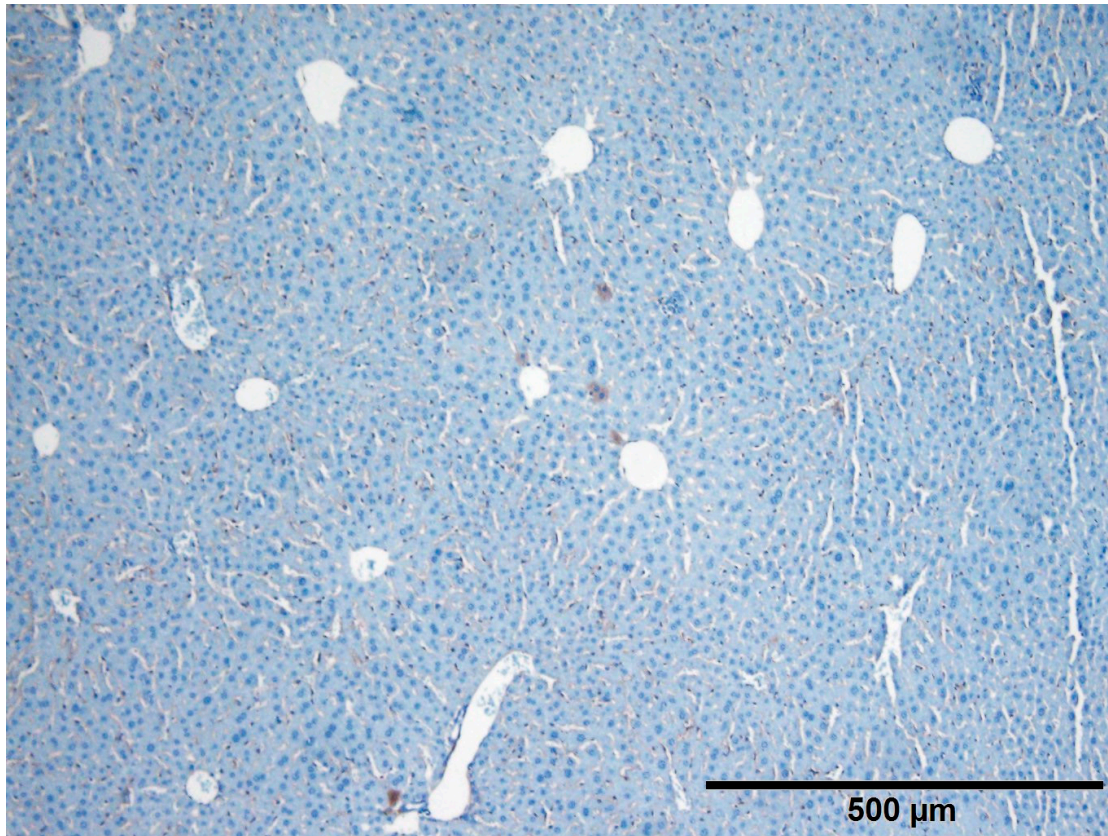



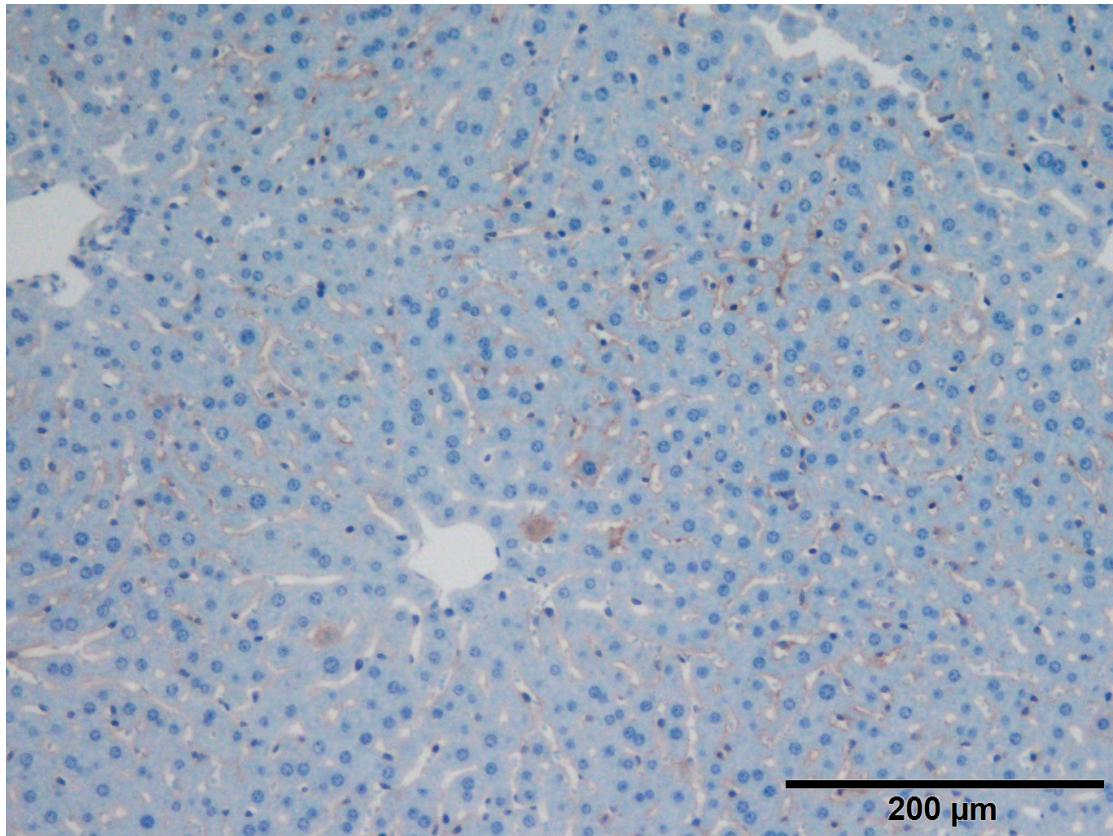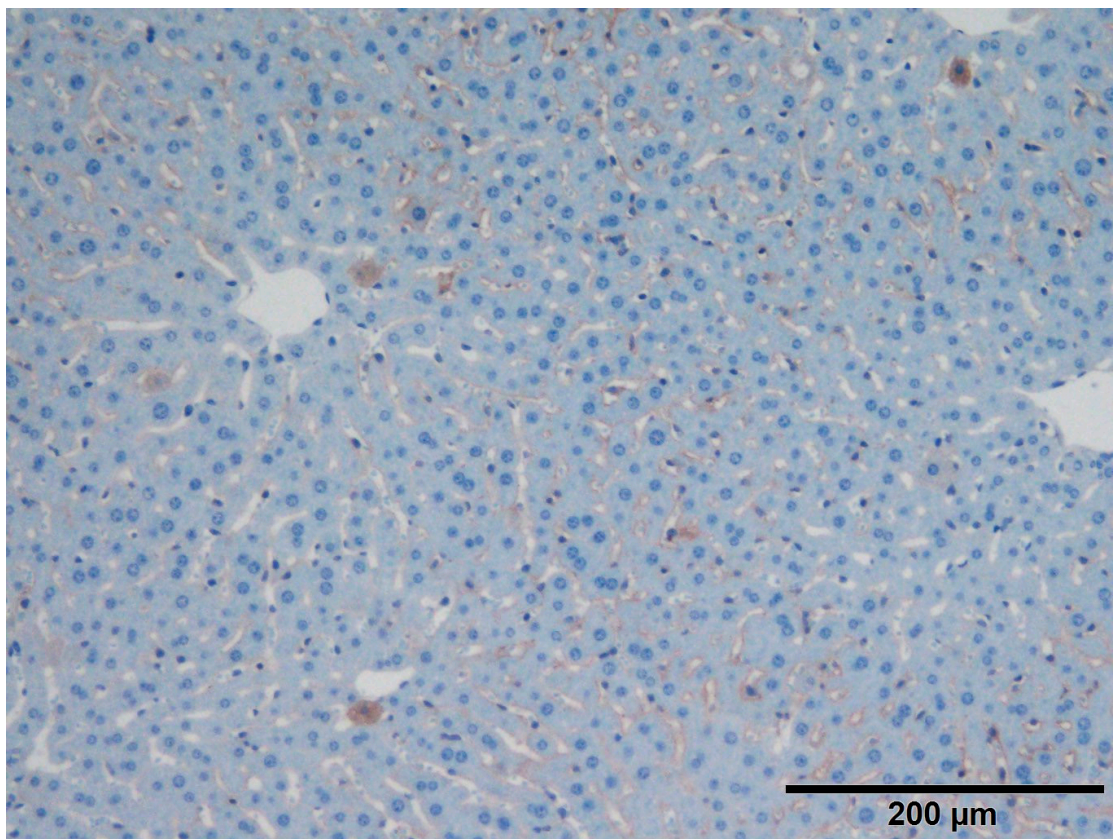



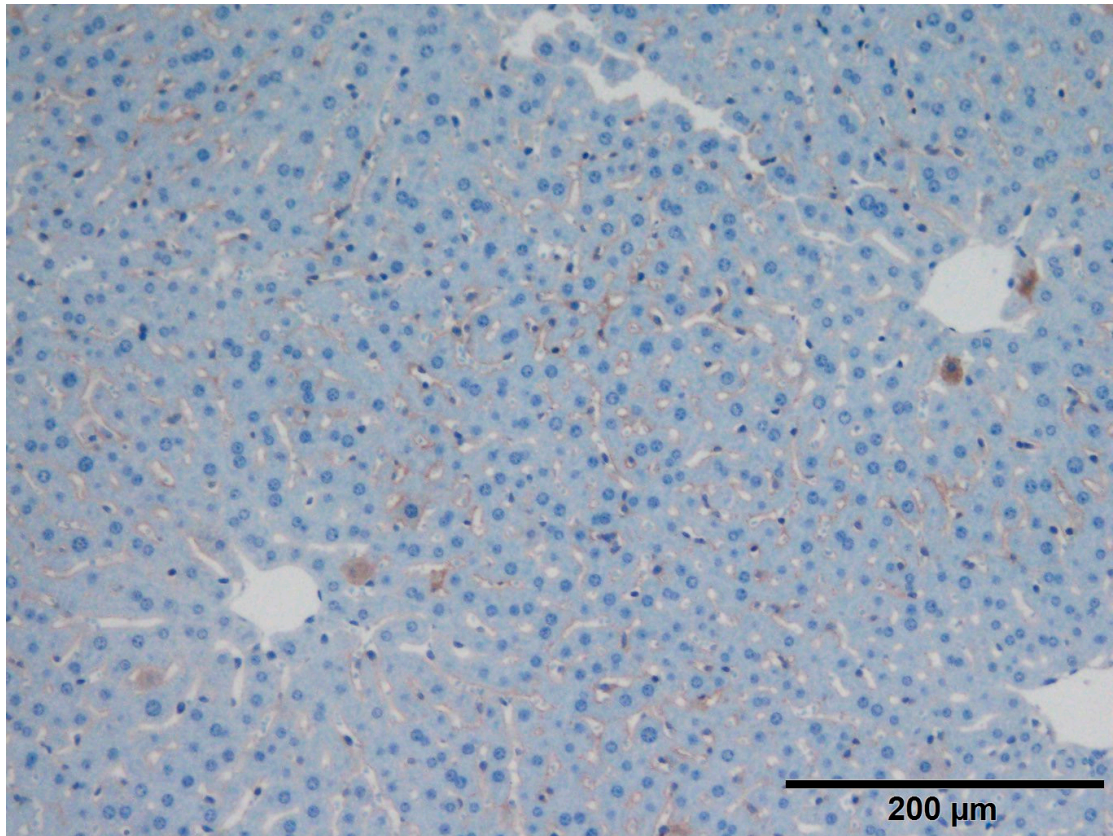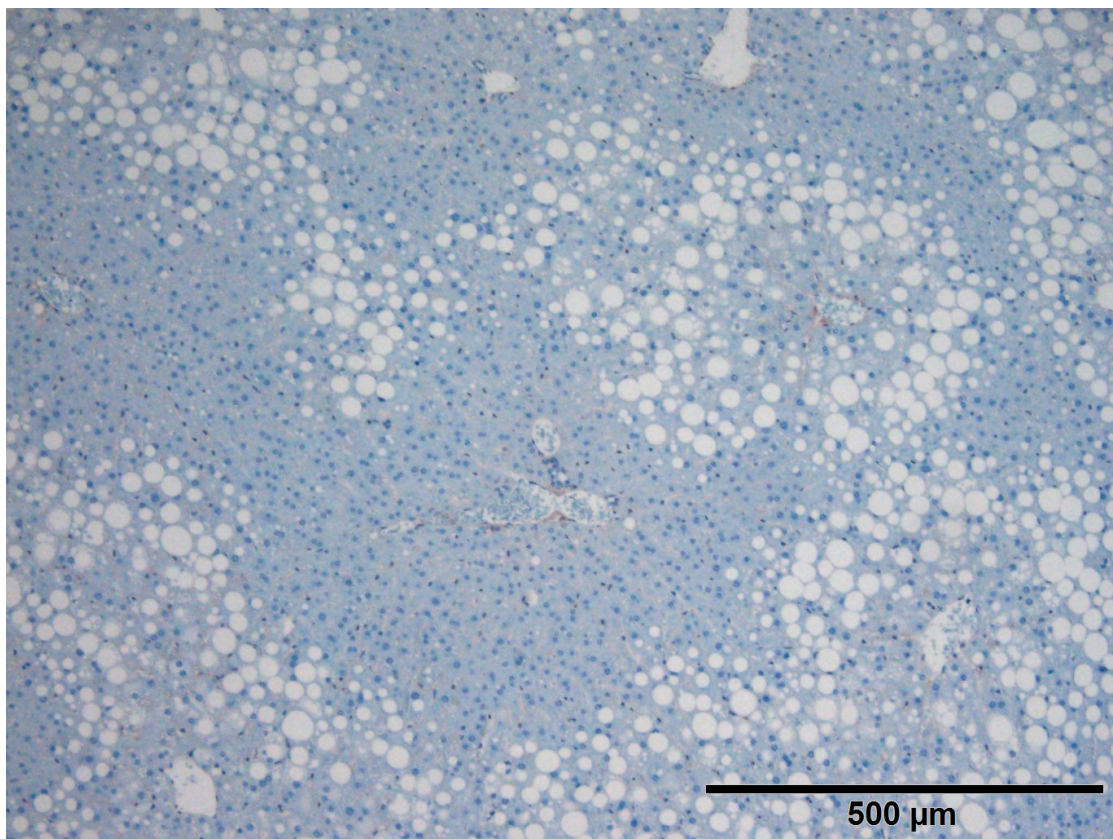



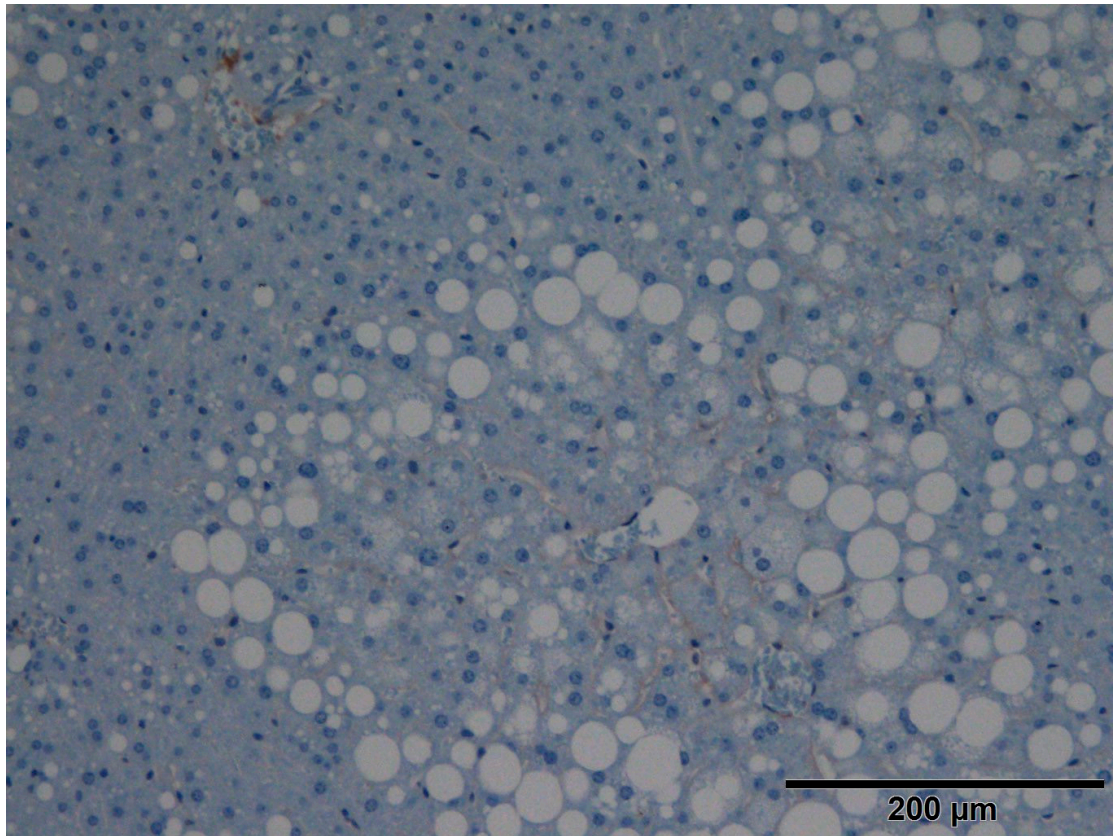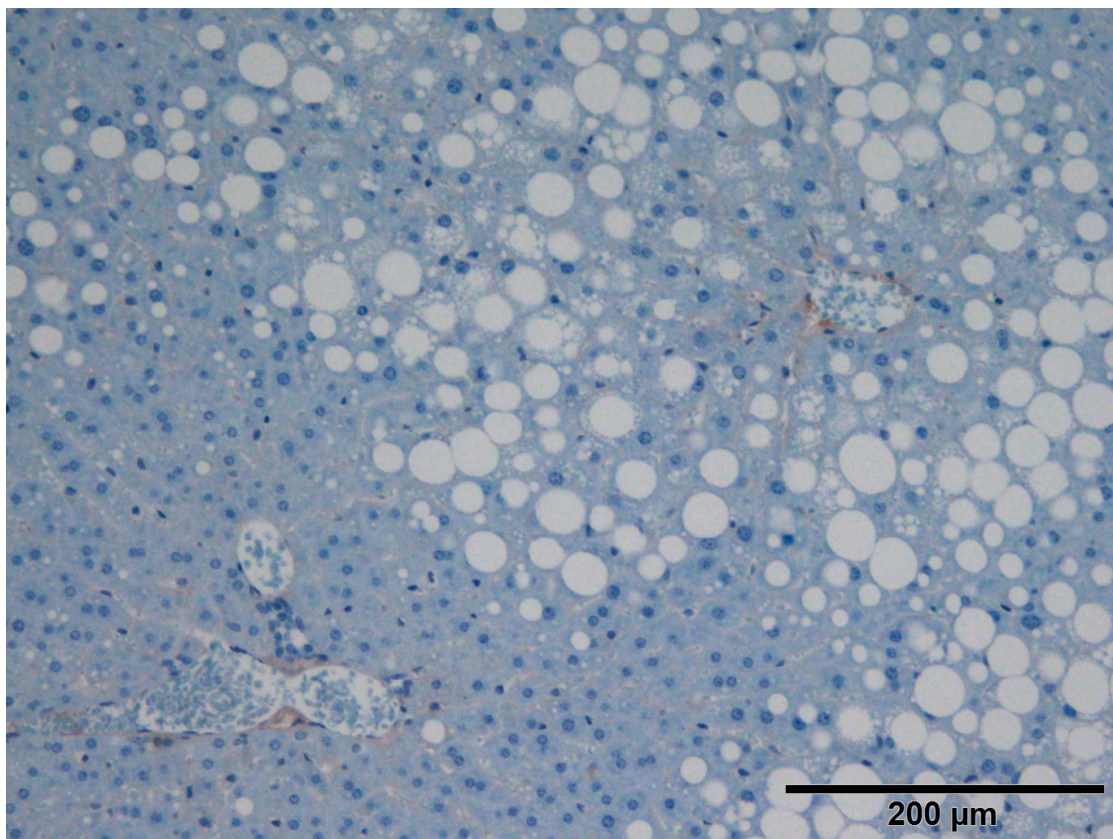



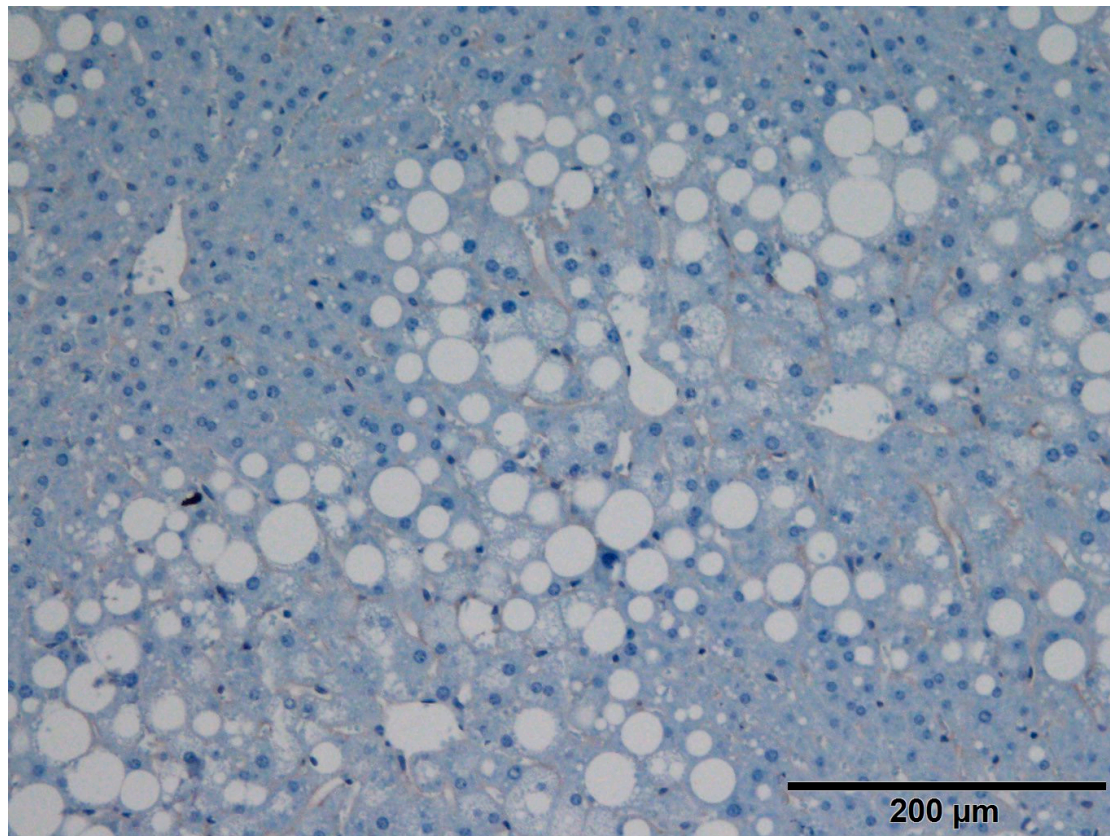

Figure S3D CTR1, ATP7A, ATP7B, DMT1, CP and Tublin- $\alpha$  bands observed in liver of mice.

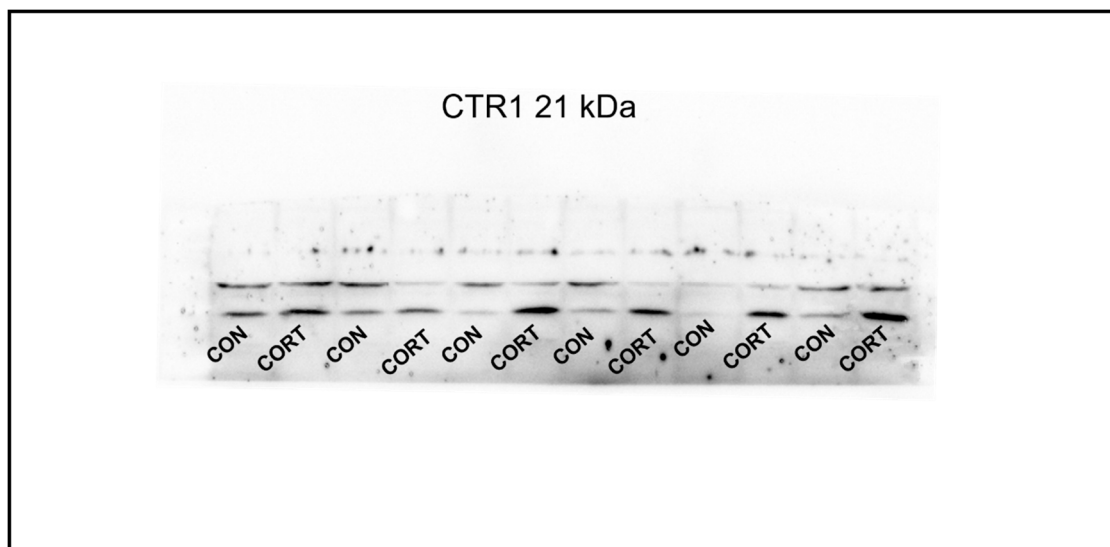

ATP7A 160 kDa

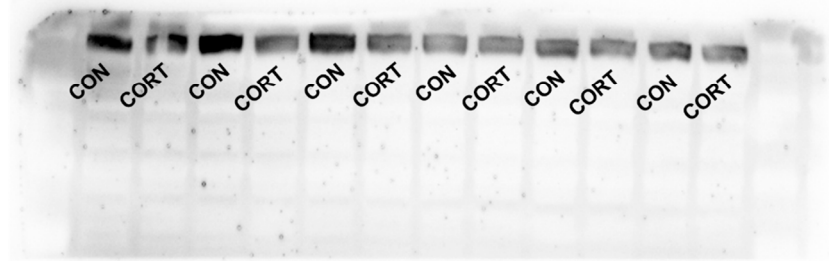

ATP7B 160 kDa

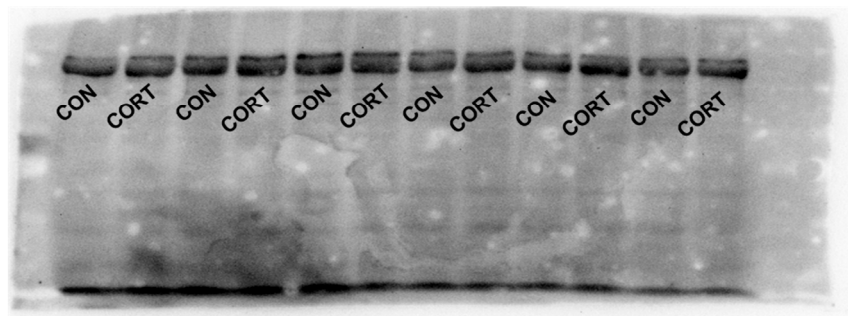

DMT1 62 kDa

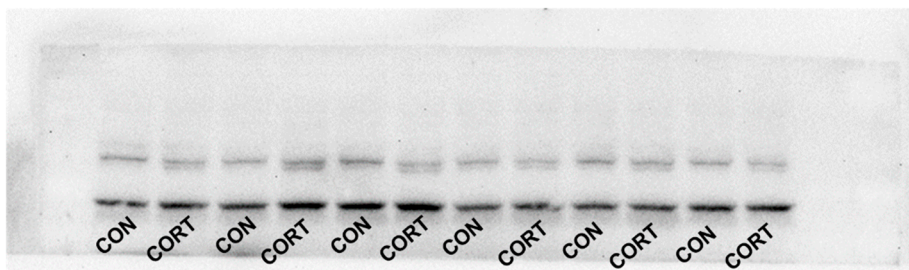

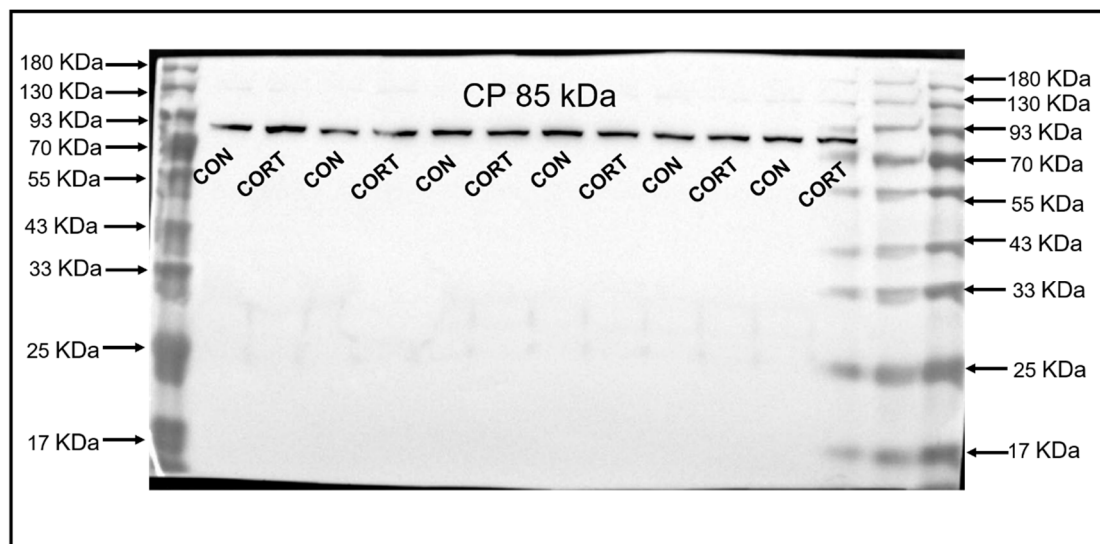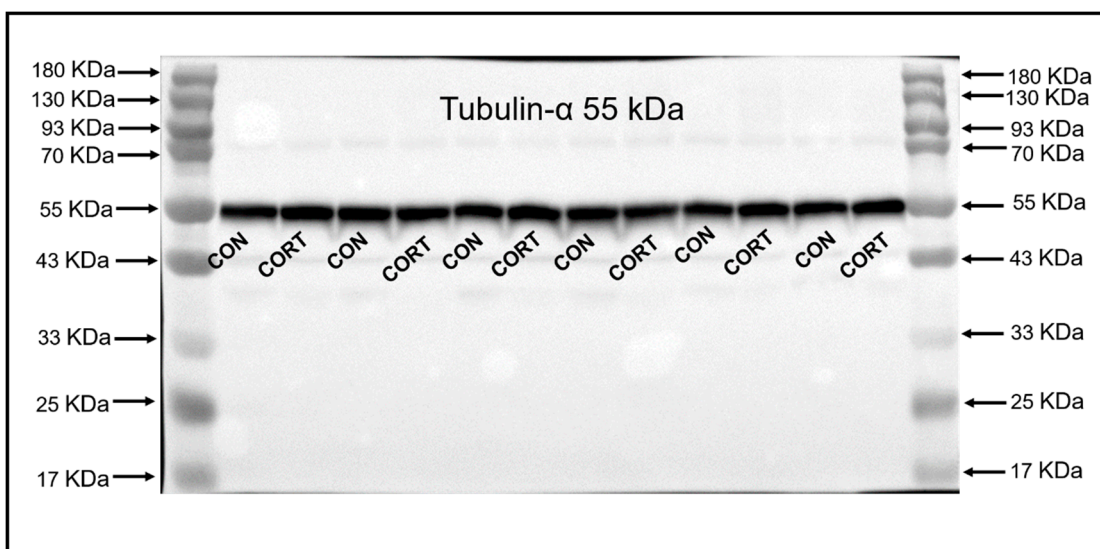

Figure S4A CTR1 and  $\beta$ -Actin bands observed in Caco-2 cells

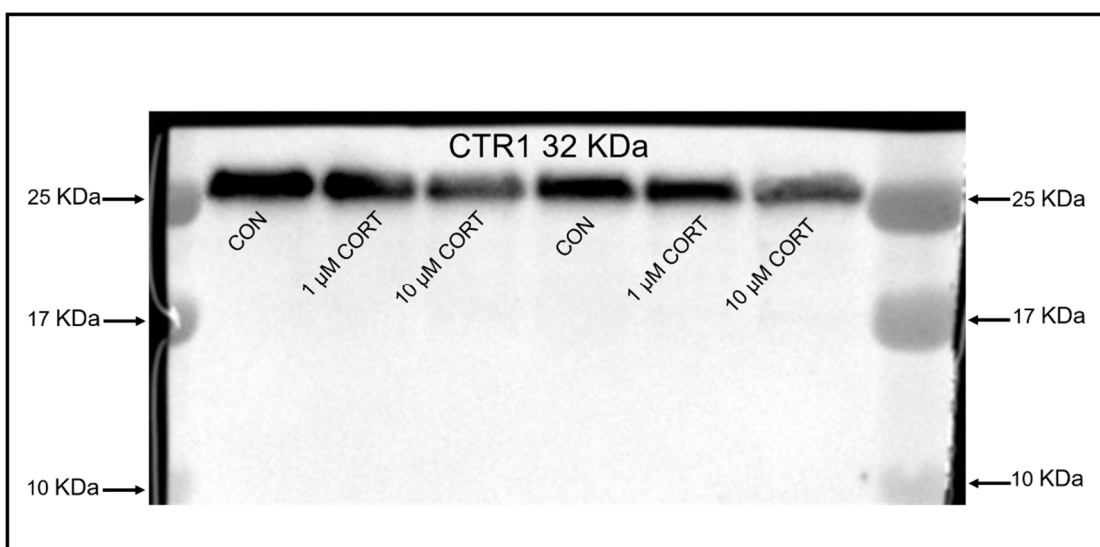

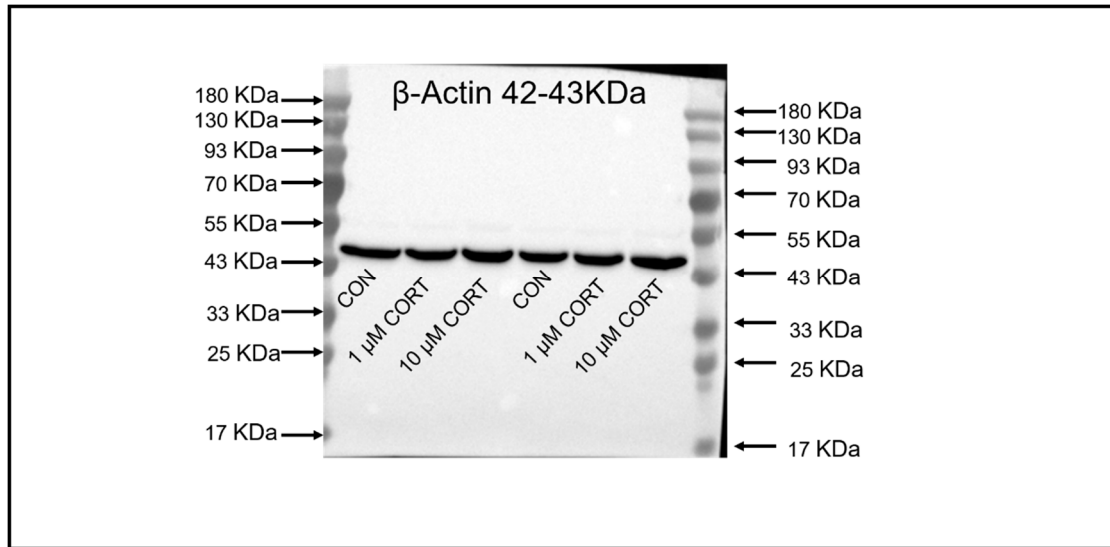

Figure S4B CTR1 and Tubulin- $\alpha$  bands observed in Caco-2 cells

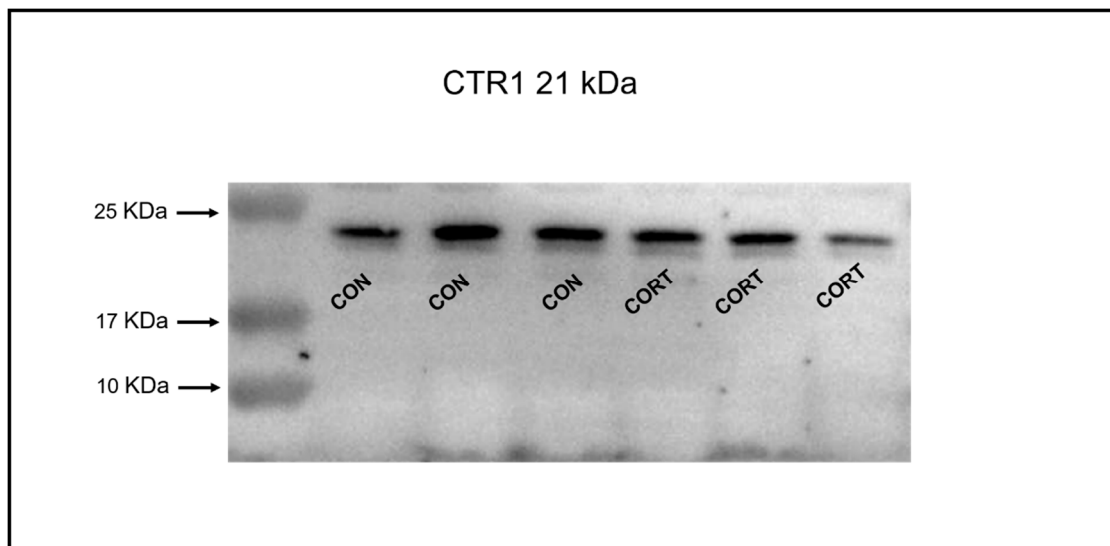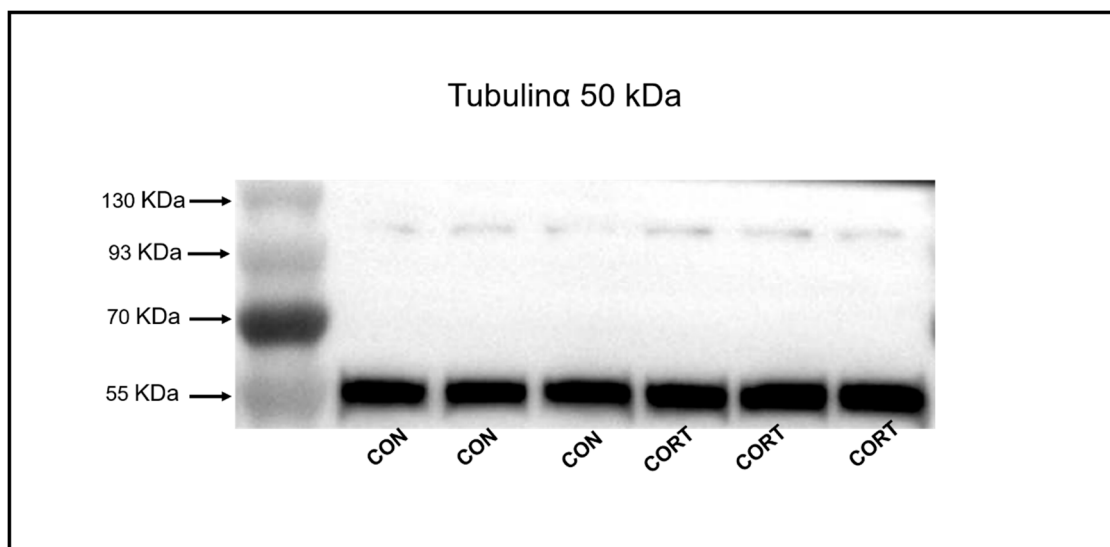

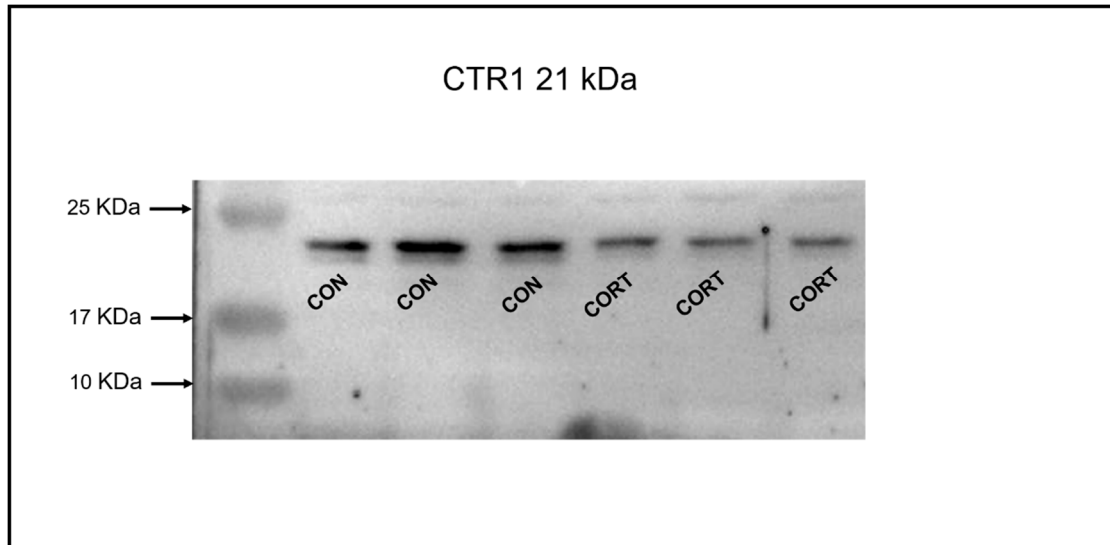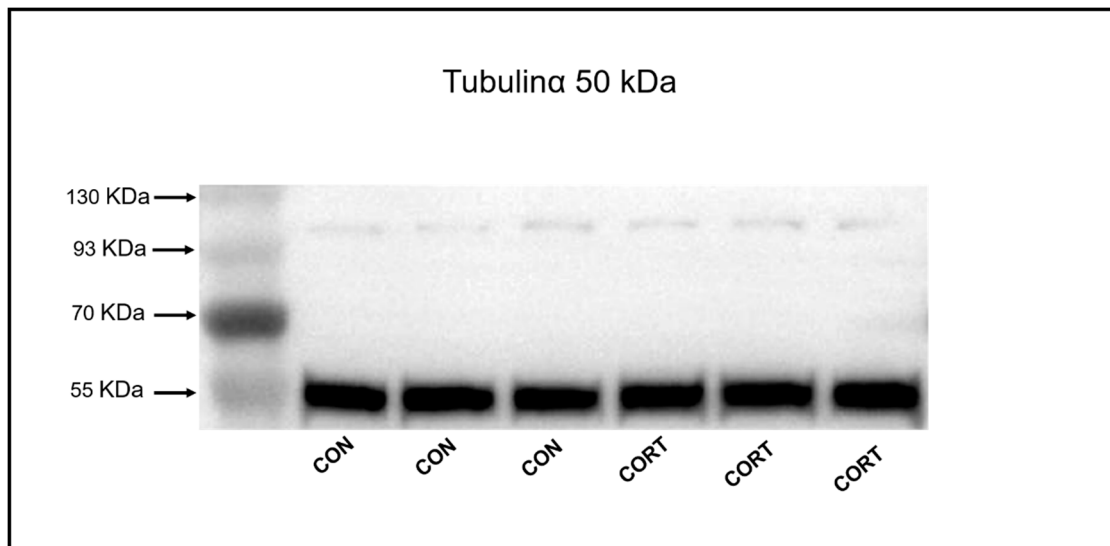

Figure S4C CTR1 and Tubulin- $\alpha$  bands observed in HepG2 cells

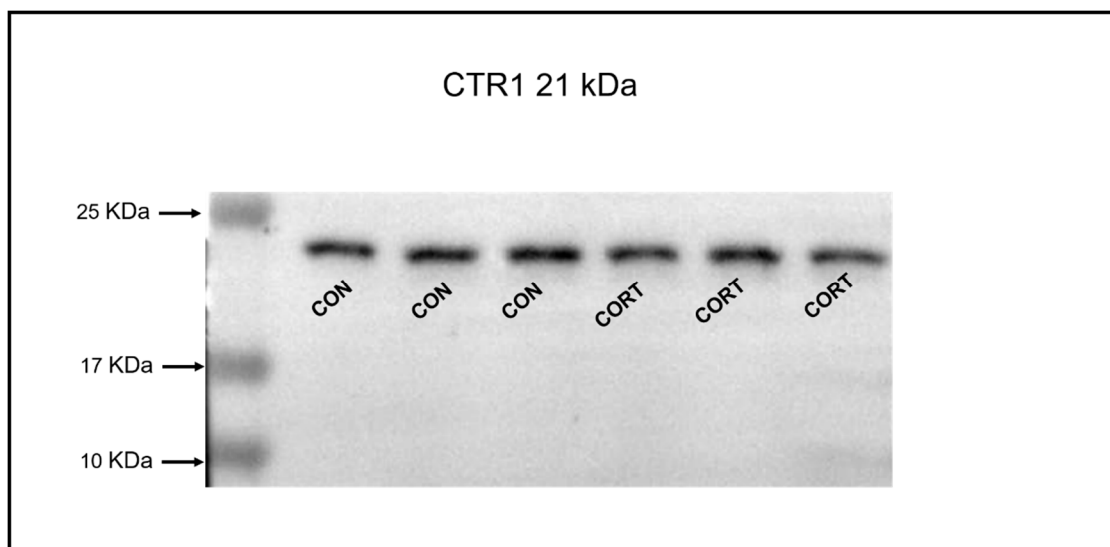



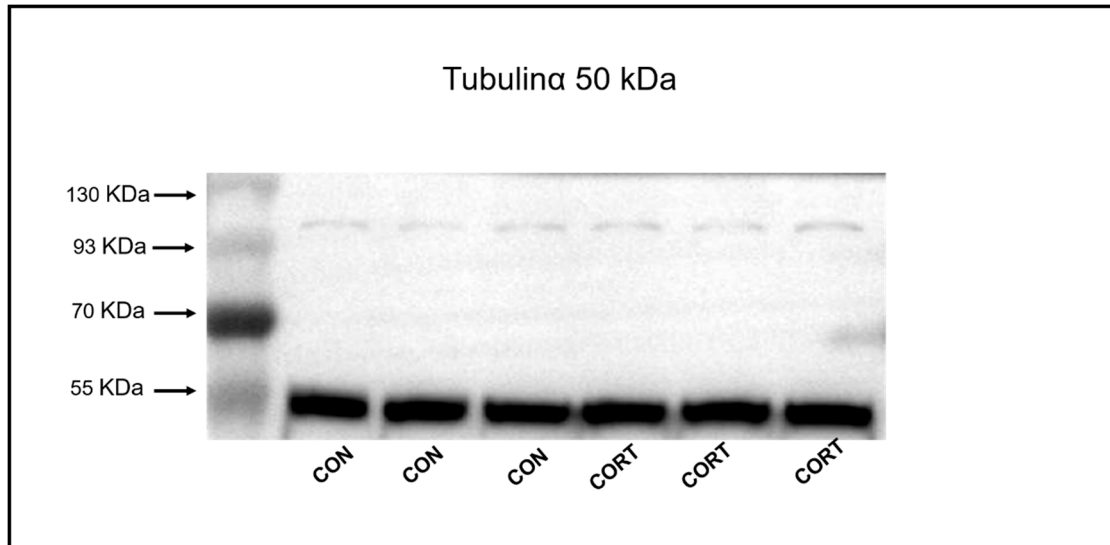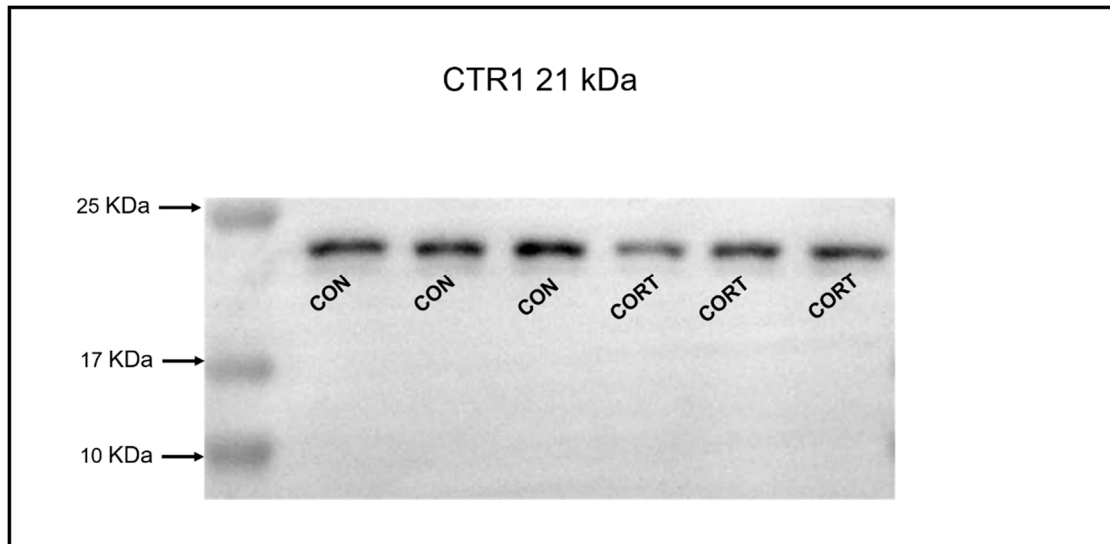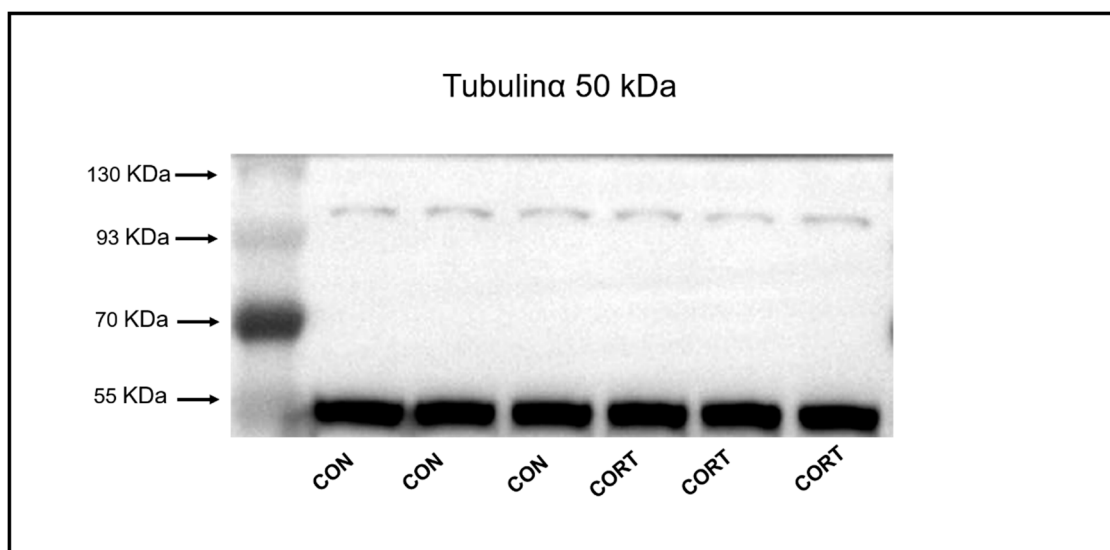

Figure S5A GR, p-GR and  $\beta$ -Actin bands observed in Caco-2 cells



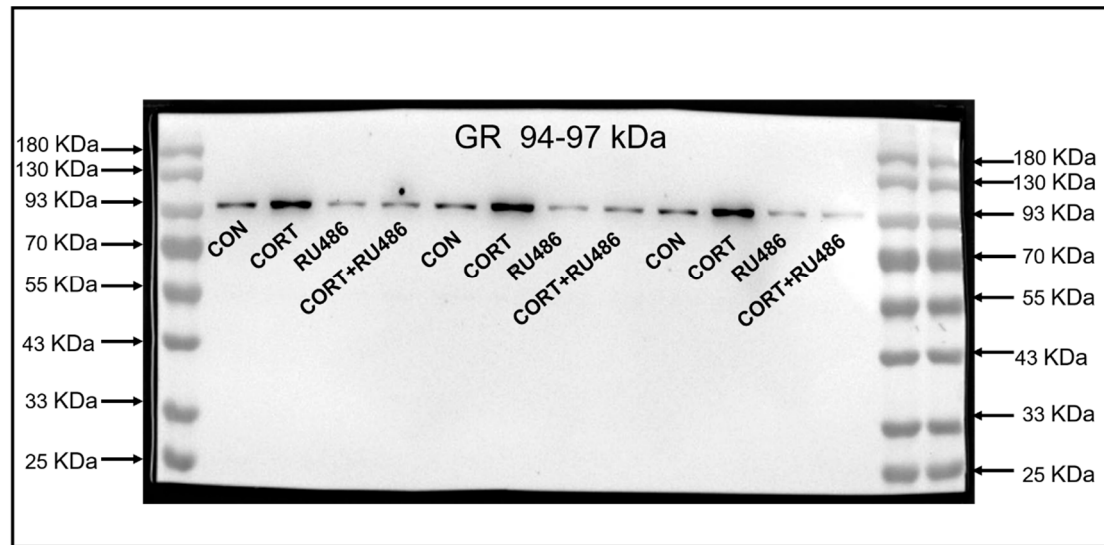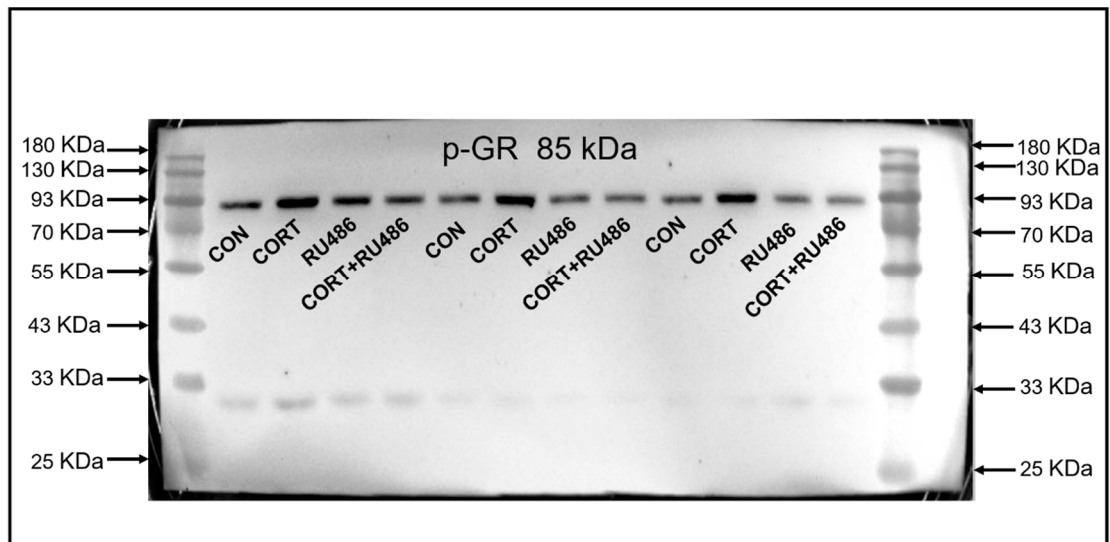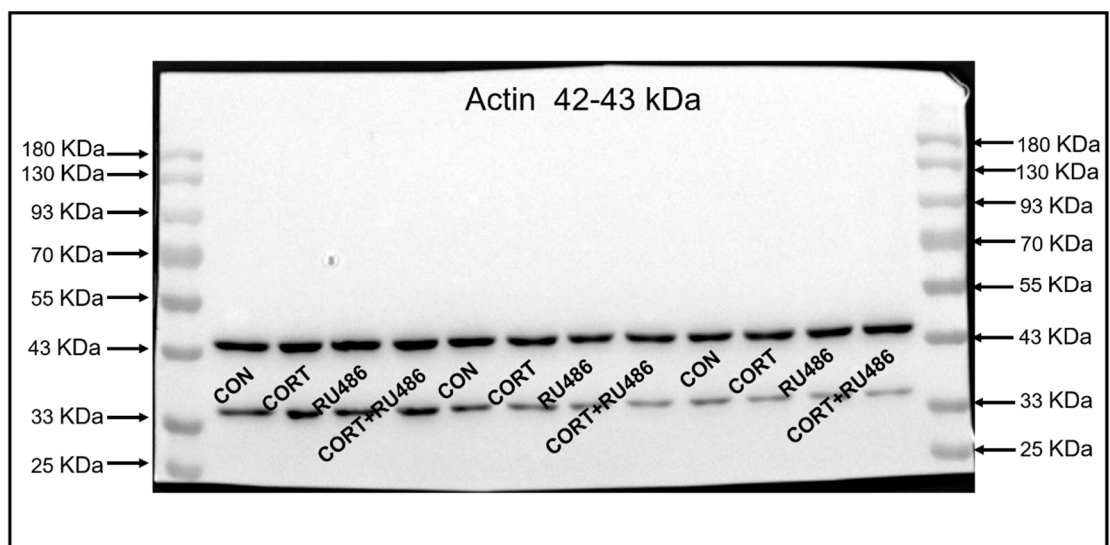

Figure S5B GR, Lamin- $\beta$  and Tubulin- $\alpha$  bands observed in Caco-2 cells

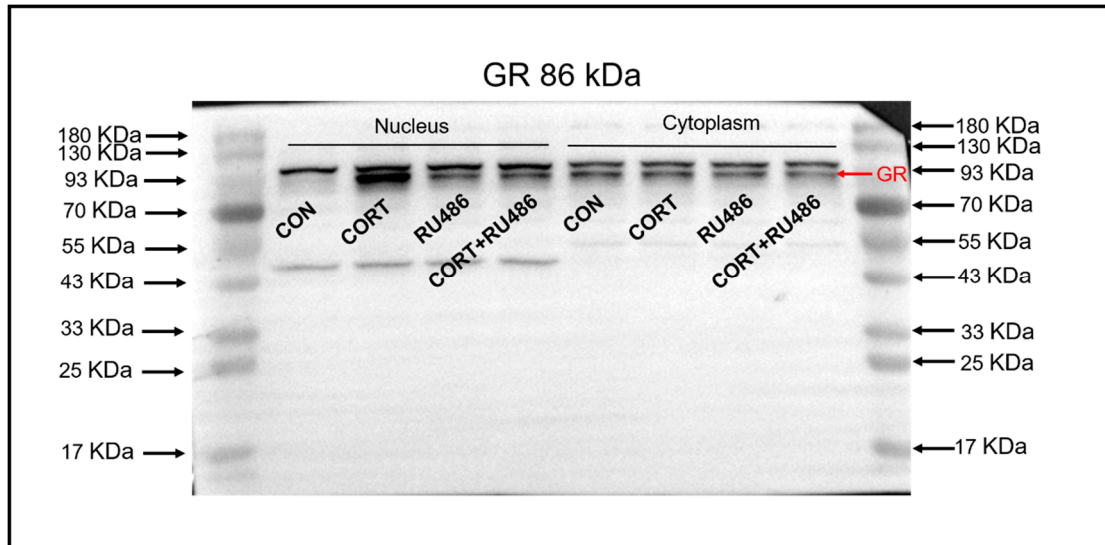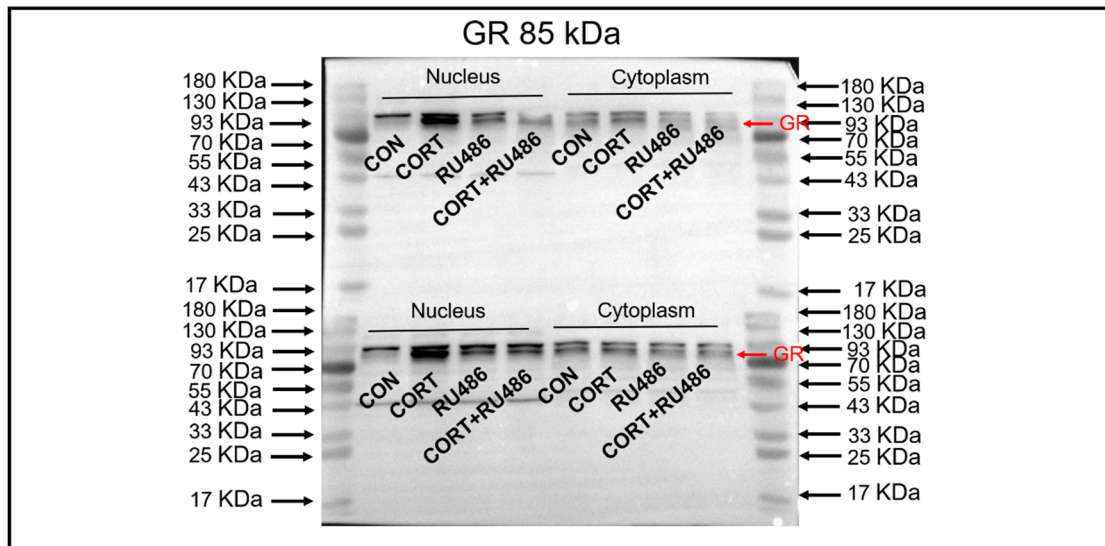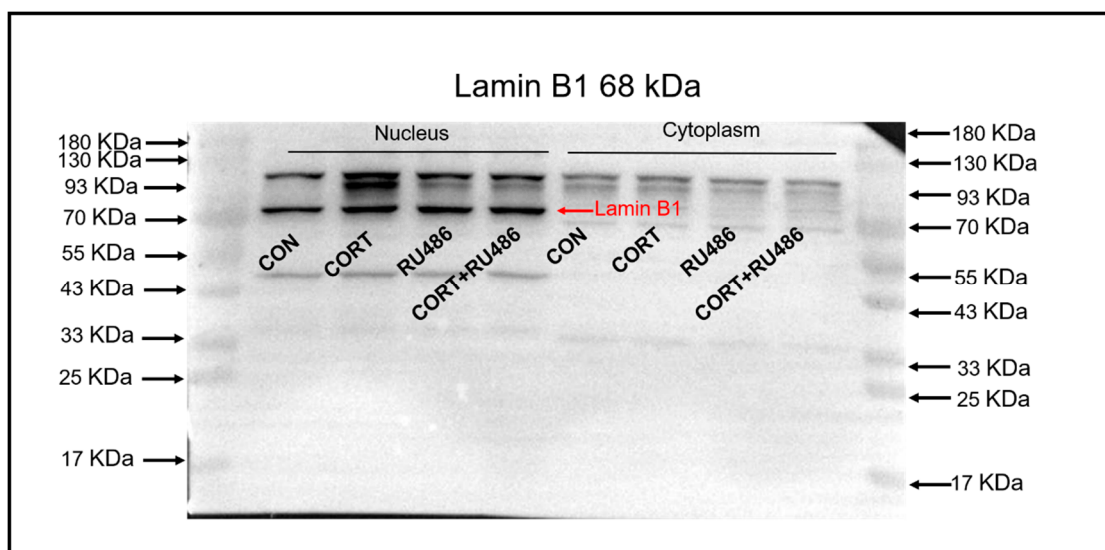

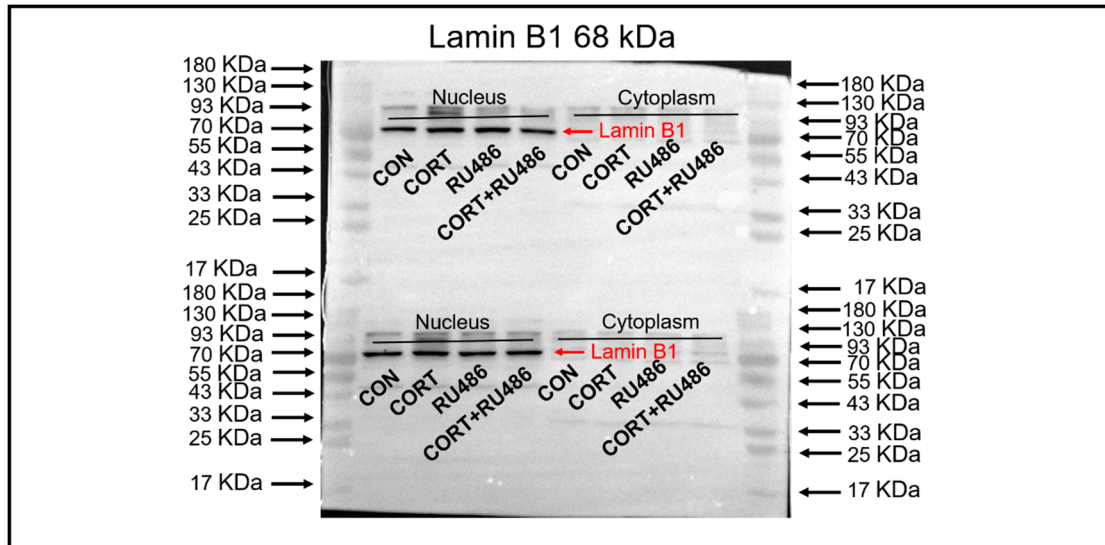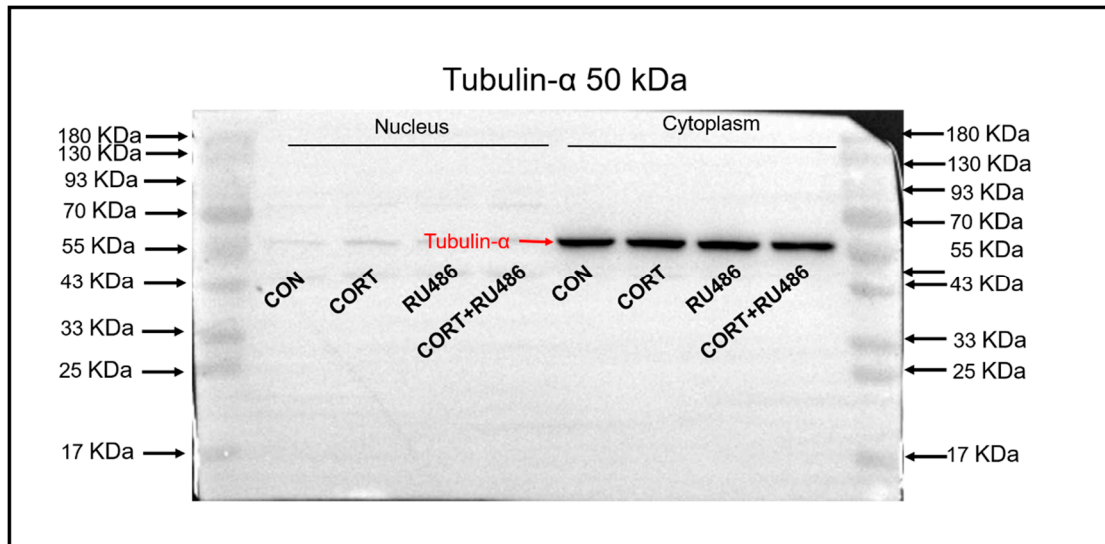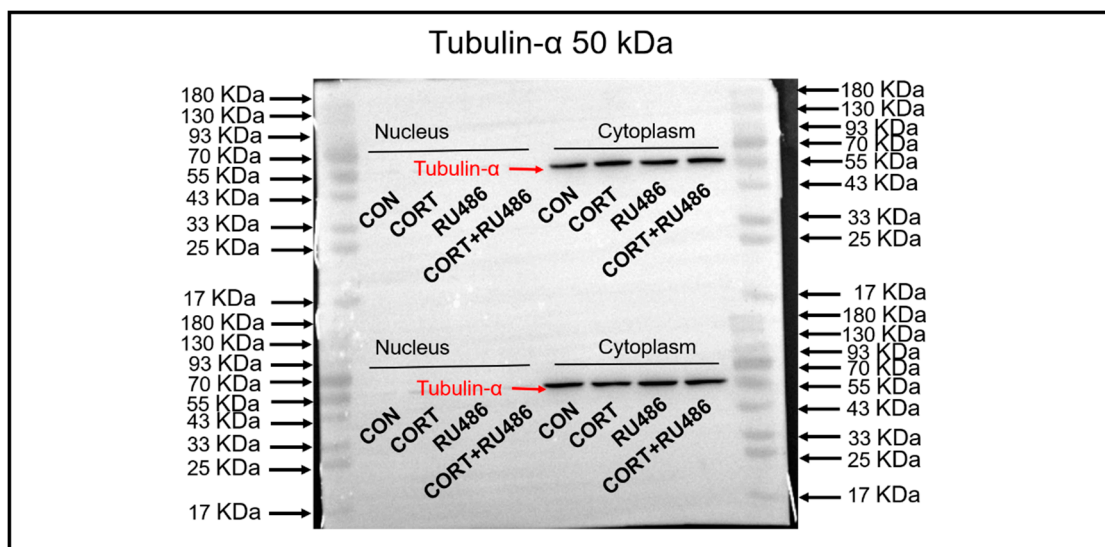

Figure S6B CTR1 and Tubulin- $\alpha$  bands observed in Caco-2 cells

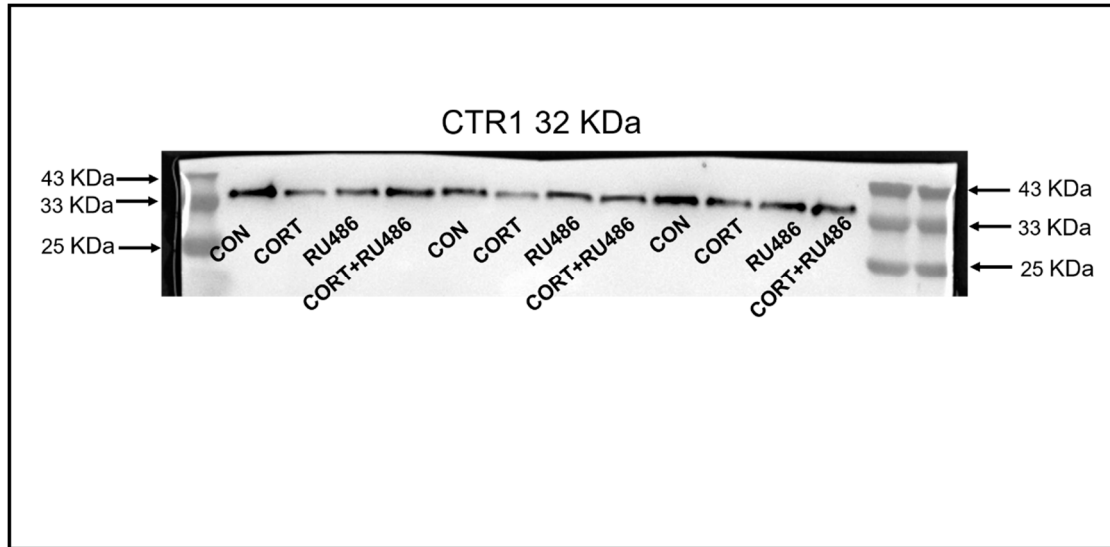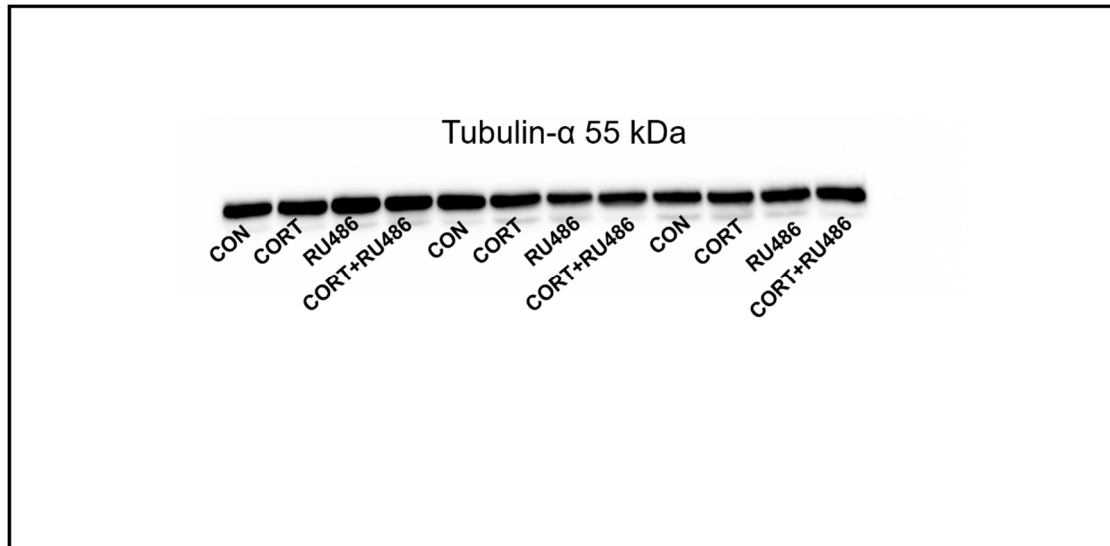

Supplement: s1 [file s1]
